# Supplementary material for: Bacterially Converted Oat Active Ingredients Enhances Antioxidative and Anti-UVB Photoaging Activities
Source: Evid Based Complement Alternat Med. 2022 May 28;2022:1901564. doi: 10.1155/2022/1901564 (PMC9187468; doi:10.1155/2022/1901564)
Supplement: Supplementary Materials — Supplementary Figure 1. GC-MSanalysis of AOE, BSO2E, KME, LPE, and ROE. Supplementary Figure 2. Quantification of avenanthramides A, B, and C. (A. Standard curve. (B) AOE, ROE, BSOOE, KME, and LPE. Supplementary Figure 3. Quantification of coumaric acid, caffeic acid, ferulic acid, and vanillin quantification. (A) Standard curve. (B) AOE, ROE, BSOOE, KME, and LPE. [file 1901564.f1.pdf]

# AOE

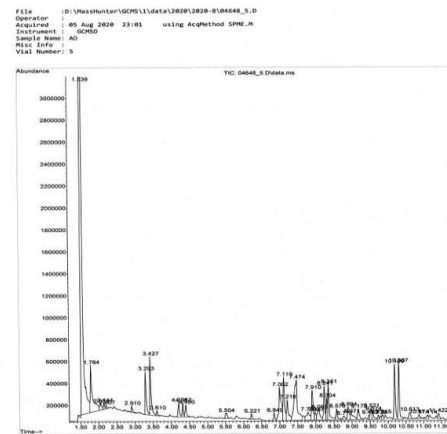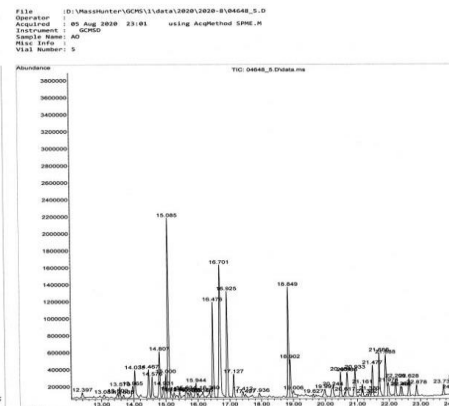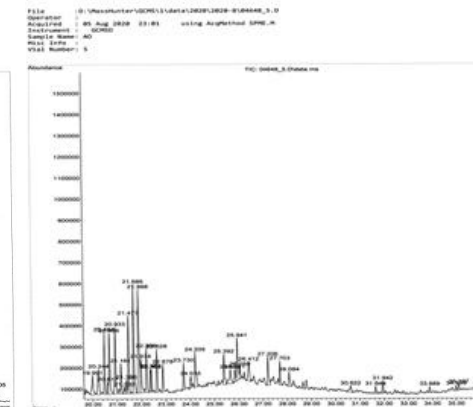**BSO2E**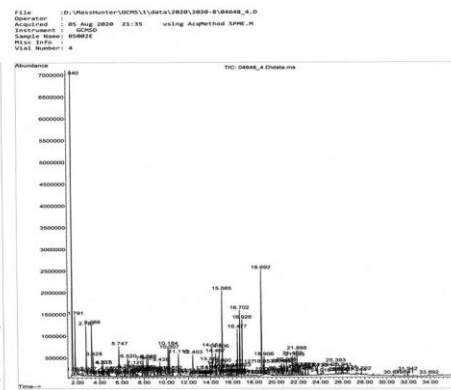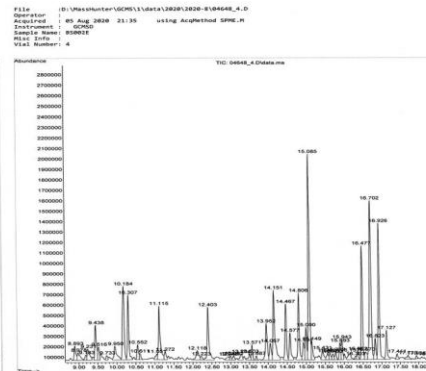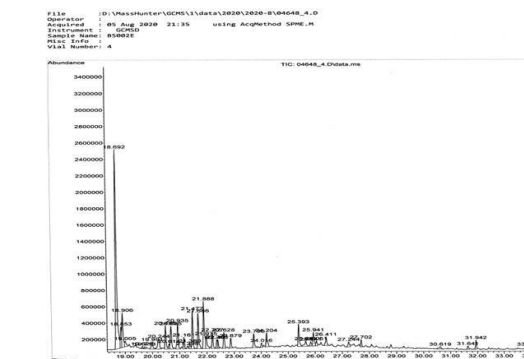

**KME**

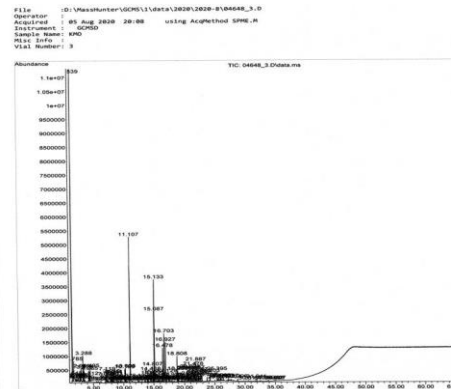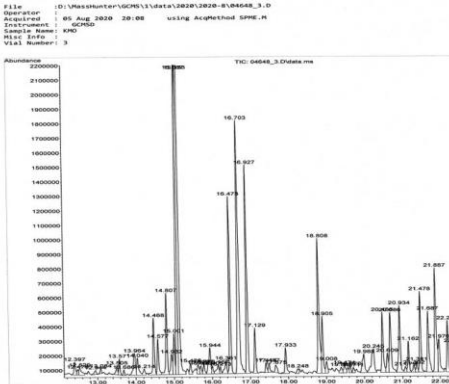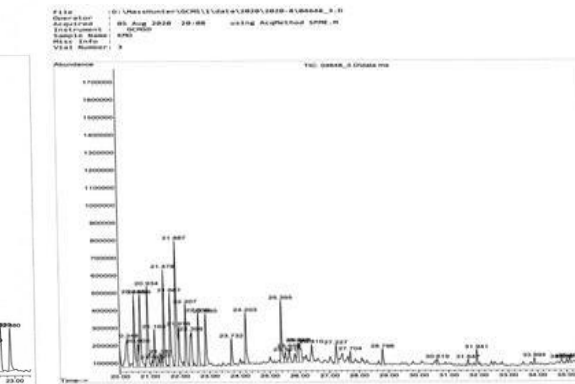

File D:\MassHunter\GCMS\1\data\2020\2020-01\06648\_3.D  
Operator [redacted]  
Acquired 05 Aug 2020 18:42 using AcqMethod SPMF.R  
Instrument GC/MS  
Sample Name LP 100  
File Info  
VIAI Number: 2

Abundance

TIC: 06648\_3.D.ms

Time-->

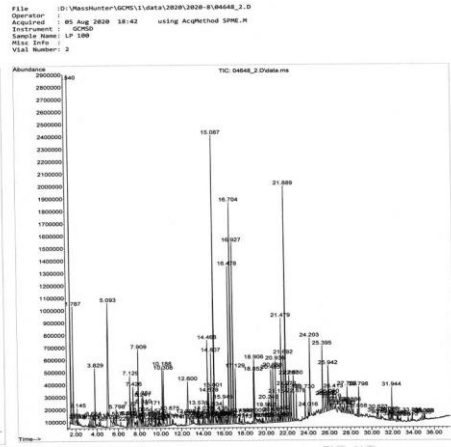

File D:\MassHunter\GCMS\1\Data\130201\130201-01\060406\_0.D  
 Sample Name 130201\_01  
 Acquired on 06 Aug 2020 09:28 using Acquisition SPM 9  
 Data Path D:\MassHunter\GCMS\1\Data\130201\130201-01\060406\_0.D  
 13.43 Number 6

TIC: 060406\_0.D\data.ms

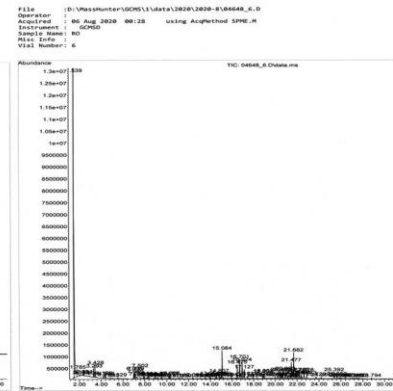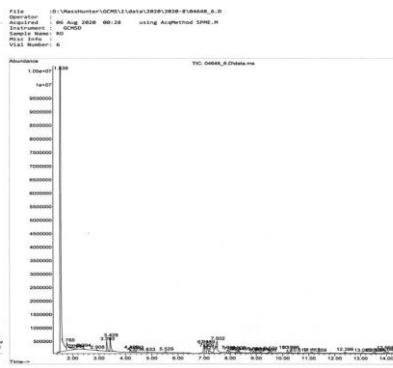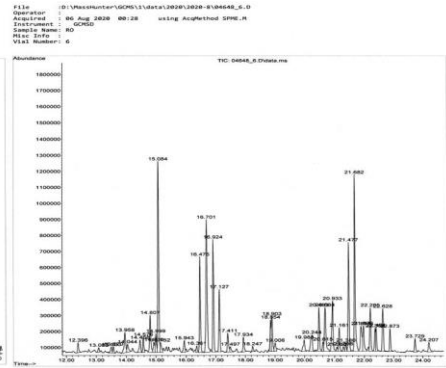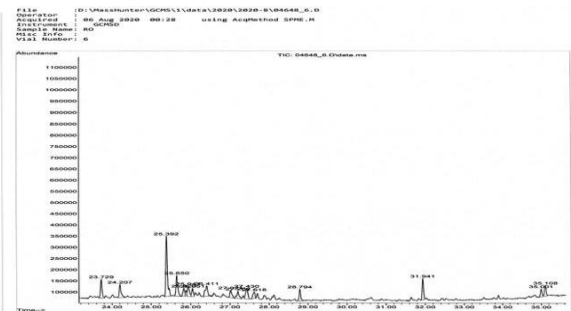

# Supplementary Figure 2. Quantification of avenanthramides A, B and C. A) AOE, ROE, BSO02E, KME and LPE

A)

## Avenanthramide Standard curve

### Avenanthramide A

Compound name: A-A  
Correlation coefficient:  $r = 0.994872$ ,  $r^2 = 0.989771$   
Calibration curve:  $1076.26 \times x + 6669.64$   
Response type: External Std, Area  
Curve type: Linear, Origin: Exclude, Weighting:  $1/x$ , Axis trans: None

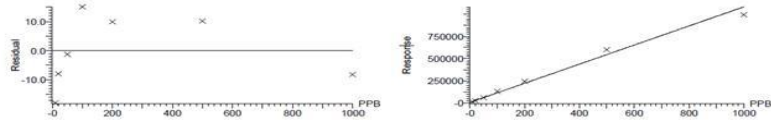

### Avenanthramide B

Compound name: A-B  
Correlation coefficient:  $r = 0.998920$ ,  $r^2 = 0.997840$   
Calibration curve:  $1054.46 \times x + 24181.5$   
Response type: External Std, Area  
Curve type: Linear, Origin: Exclude, Weighting: Null, Axis trans: None

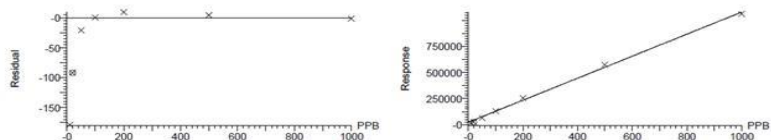

### Avenanthramide C

Compound name: A-C  
Correlation coefficient:  $r = 0.998700$ ,  $r^2 = 0.997402$   
Calibration curve:  $648.898 \times x + 5267.86$   
Response type: External Std, Area  
Curve type: Linear, Origin: Exclude, Weighting:  $1/x$ , Axis trans: None

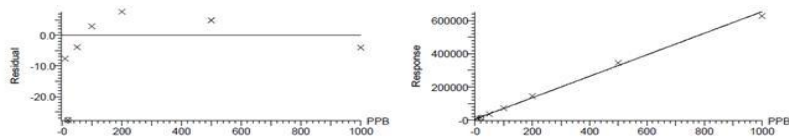

B)

### AOE

#### Quantify Sample Report MassLynx V4.2 SCN977

Dataset: C:\MassLynx\2020.PRO\2020-08175.qld

Last Altered: Tuesday, October 27, 2020 10:26:57 Korea Standard Time  
Printed: Tuesday, October 27, 2020 10:28:49 Korea Standard Time

Name: 08175-AO, Date: 26-Oct-2020, Time: 18:00:45, ID: , Description:

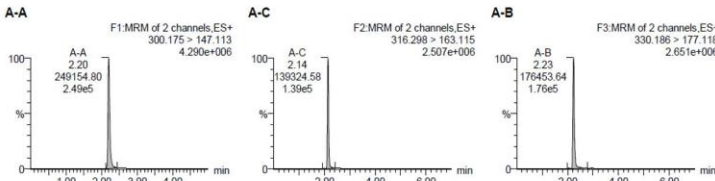

|   | # | Name | Trace             | RT   | Area       | IS Area | Response   | Primer... | PPB   | %Dev |
|---|---|------|-------------------|------|------------|---------|------------|-----------|-------|------|
| 1 | 1 | A-A  | 300.175 > 147.113 | 2.20 | 249154.797 |         | 249154.797 | bb        | 225.3 |      |
| 2 | 2 | A-C  | 316.298 > 163.115 | 2.14 | 139324.578 |         | 139324.578 | bb        | 206.6 |      |
| 3 | 3 | A-B  | 330.186 > 177.118 | 2.23 | 176453.641 |         | 176453.641 | bb        | 144.4 |      |

### BS002E

#### Quantify Sample Report MassLynx V4.2 SCN977

Dataset: C:\MassLynx\2020.PRO\2020-08175.qld

Last Altered: Tuesday, October 27, 2020 10:26:57 Korea Standard Time  
Printed: Tuesday, October 27, 2020 10:28:49 Korea Standard Time

Name: 08175-BS002E, Date: 26-Oct-2020, Time: 17:37:25, ID: , Description:

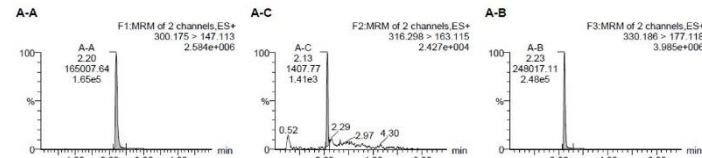

|   | # | Name | Trace             | RT   | Area       | IS Area | Response   | Primer... | PPB   | %Dev |
|---|---|------|-------------------|------|------------|---------|------------|-----------|-------|------|
| 1 | 1 | A-A  | 300.175 > 147.113 | 2.20 | 165007.641 |         | 165007.641 | bb        | 147.1 |      |
| 2 | 2 | A-C  | 316.298 > 163.115 | 2.13 | 1407.768   |         | 1407.768   | bb        |       |      |
| 3 | 3 | A-B  | 330.186 > 177.118 | 2.23 | 248017.109 |         | 248017.109 | bb        | 212.3 |      |

### KME

#### Quantify Sample Report MassLynx V4.2 SCN977

Dataset: C:\MassLynx\2020.PRO\2020-08175.qld

Last Altered: Tuesday, October 27, 2020 10:26:57 Korea Standard Time  
Printed: Tuesday, October 27, 2020 10:28:49 Korea Standard Time

Name: 08175-KMO, Date: 26-Oct-2020, Time: 17:52:58, ID: , Description:

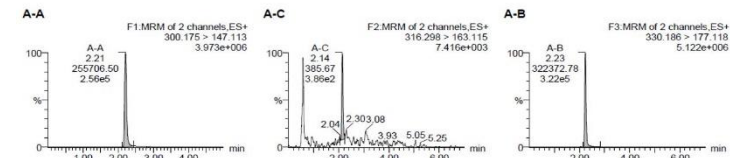

|   | # | Name | Trace             | RT   | Area       | IS Area | Response   | Primer... | PPB   | %Dev |
|---|---|------|-------------------|------|------------|---------|------------|-----------|-------|------|
| 1 | 1 | A-A  | 300.175 > 147.113 | 2.21 | 255706.500 |         | 255706.500 | bb        | 231.4 |      |
| 2 | 2 | A-C  | 316.298 > 163.115 | 2.14 | 385.674    |         | 385.674    | bb        |       |      |
| 3 | 3 | A-B  | 330.186 > 177.118 | 2.23 | 322372.781 |         | 322372.781 | bb        | 282.8 |      |

### ROE

#### Quantify Sample Report MassLynx V4.2 SCN977

Dataset: C:\MassLynx\2020.PRO\2020-08175.qld

Last Altered: Tuesday, October 27, 2020 10:26:57 Korea Standard Time  
Printed: Tuesday, October 27, 2020 10:28:49 Korea Standard Time

Name: 08175-RO, Date: 26-Oct-2020, Time: 18:08:34, ID: , Description:

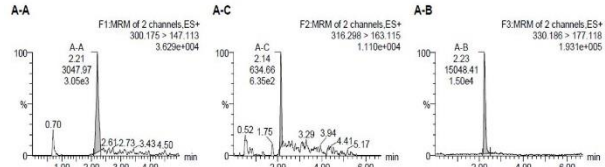

|   | # | Name | Trace             | RT   | Area      | IS Area | Response  | Primer... | PPB | %Dev |
|---|---|------|-------------------|------|-----------|---------|-----------|-----------|-----|------|
| 1 | 1 | A-A  | 300.175 > 147.113 | 2.21 | 3047.965  |         | 3047.965  | bb        |     |      |
| 2 | 2 | A-C  | 316.298 > 163.115 | 2.14 | 634.661   |         | 634.661   | bb        |     |      |
| 3 | 3 | A-B  | 330.186 > 177.118 | 2.23 | 15048.410 |         | 15048.410 | bb        |     |      |

### LPE

#### Quantify Sample Report MassLynx V4.2 SCN977

Dataset: C:\MassLynx\2020.PRO\2020-08175.qld

Last Altered: Tuesday, October 27, 2020 10:26:57 Korea Standard Time  
Printed: Tuesday, October 27, 2020 10:28:49 Korea Standard Time

Name: 08175-LPE, Date: 26-Oct-2020, Time: 17:45:12, ID: , Description:

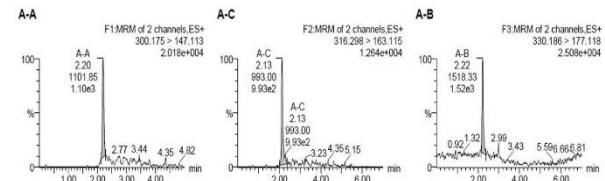

|   | # | Name | Trace             | RT   | Area     | IS Area | Response | Primer... | PPB | %Dev |
|---|---|------|-------------------|------|----------|---------|----------|-----------|-----|------|
| 1 | 1 | A-A  | 300.175 > 147.113 | 2.20 | 1101.854 |         | 1101.854 | bb        |     |      |
| 2 | 2 | A-C  | 316.298 > 163.115 | 2.13 | 993.000  |         | 993.000  | bb        |     |      |
| 3 | 3 | A-B  | 330.186 > 177.118 | 2.22 | 1518.325 |         | 1518.325 | bb        |     |      |

Supplementary Figure 3. Quantification of coumaric acid, caffeic acid, ferulic acid and canillin quatification. A) Standard curve. B) AOE, ROE, BSOOE, KME and LPE

A)

Standard curve for courmaric acid      Standard curve for caffeic acid

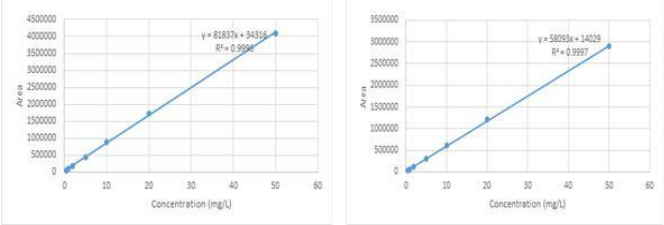

Standard curve for ferulic acid      Standard curve for vanillin

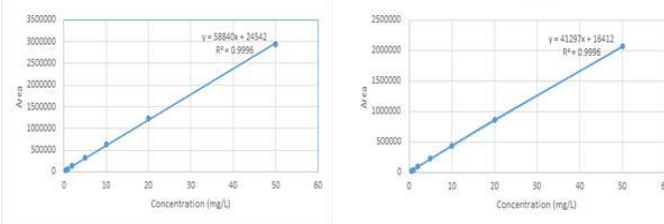

B)

AOE  
LabSolutions Analysis Report

<Sample Information>  
Sample Name : AO  
Sample ID :  
Data Filename : AO.kd  
Method Filename : 08010M.km  
Batch Filename : 08010M.kd  
Vial # : 1-21  
Injection Volume : 10 µL  
Date Acquired : 2020-10-27 8:09:48  
Date Processed : 2020-10-27 10:00:18  
Sample Type : Unknown  
Acquired by : System Administrator  
Processed by : System Administrator

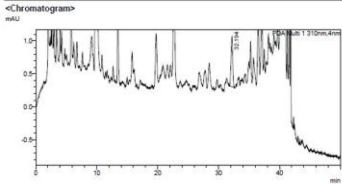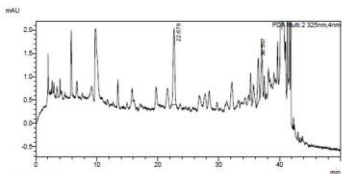

<Peak Table>  
PDA Ch1 310nm

| Peak Ret. Time | Area   | Height | Conc. | Unit       | Mark | Name     |
|----------------|--------|--------|-------|------------|------|----------|
| 1              | 32.185 | 14848  | 761   | 0.380 mg/L |      | Coumaric |
| Total          |        | 14848  | 761   |            |      |          |

| Peak Ret. Time | Area   | Height | Conc. | Unit       | Mark | Name    |
|----------------|--------|--------|-------|------------|------|---------|
| 1              | 36.507 | 14519  | 990   | 0.171 mg/L |      | Ferulic |
| Total          |        | 44811  | 2580  |            |      |         |

ROE  
LabSolutions Analysis Report

<Sample Information>  
Sample Name : RO  
Sample ID :  
Data Filename : RO.kd  
Method Filename : 08010M.km  
Batch Filename : 08010M.kd  
Vial # : 1-25  
Injection Volume : 10 µL  
Date Acquired : 2020-10-27 9:05:15  
Date Processed : 2020-10-27 10:05:10  
Sample Type : Unknown  
Acquired by : System Administrator  
Processed by : System Administrator

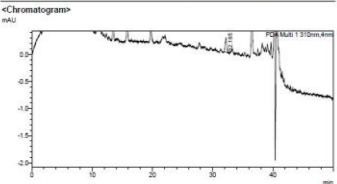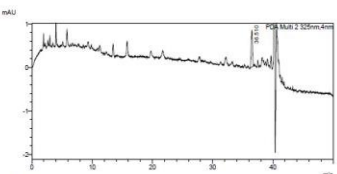

<Peak Table>  
PDA Ch1 310nm

| Peak Ret. Time | Area   | Height | Conc. | Unit       | Mark | Name     |
|----------------|--------|--------|-------|------------|------|----------|
| 1              | 32.185 | 4837   | 250   | 0.383 mg/L |      | Coumaric |
| Total          |        | 4837   | 250   |            |      |          |

| Peak Ret. Time | Area   | Height | Conc. | Unit       | Mark | Name    |
|----------------|--------|--------|-------|------------|------|---------|
| 1              | 36.510 | 12791  | 842   | 0.200 mg/L |      | Ferulic |
| Total          |        | 12791  | 842   |            |      |         |

BSO02E  
LabSolutions Analysis Report

<Sample Information>  
Sample Name : BSO02E  
Sample ID :  
Data Filename : BSO02E.kd  
Method Filename : 08010M.km  
Batch Filename : 08010M.kd  
Vial # : 1-21  
Injection Volume : 10 µL  
Date Acquired : 2020-10-27 5:23:25  
Date Processed : 2020-10-27 9:59:37  
Sample Type : Unknown  
Acquired by : System Administrator  
Processed by : System Administrator

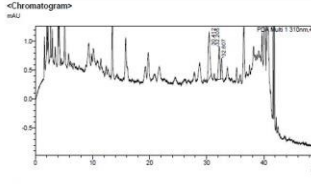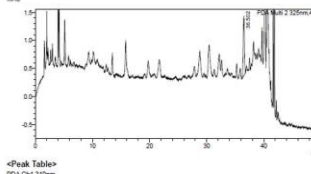

<Peak Table>  
PDA Ch1 310nm

| Peak Ret. Time | Area   | Height | Conc. | Unit       | Mark | Name     |
|----------------|--------|--------|-------|------------|------|----------|
| 1              | 30.412 | 16251  | 796   | 0.004 mg/L |      | Vanillic |
| 2              | 32.285 | 9919   | 563   | 0.298 mg/L |      | Coumaric |
| 3              | 32.697 | 4919   | 384   | 0.000 mg/L | V    |          |
| Total          |        | 29089  | 1717  |            |      |          |

| Peak Ret. Time | Area   | Height | Conc. | Unit       | Mark | Name    |
|----------------|--------|--------|-------|------------|------|---------|
| 1              | 36.502 | 16201  | 1066  | 0.142 mg/L |      | Ferulic |
| Total          |        | 16201  | 1066  |            |      |         |

KME  
LabSolutions Analysis Report

<Sample Information>  
Sample Name : KMO  
Sample ID :  
Data Filename : KMO.kd  
Method Filename : 08010M.km  
Batch Filename : 08010M.kd  
Vial # : 1-21  
Injection Volume : 10 µL  
Date Acquired : 2020-10-27 7:14:29  
Date Processed : 2020-10-27 10:00:06  
Sample Type : Unknown  
Acquired by : System Administrator  
Processed by : System Administrator

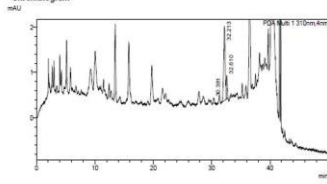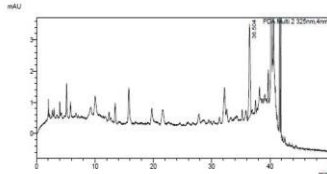

<Peak Table>  
PDA Ch1 310nm

| Peak Ret. Time | Area   | Height | Conc. | Unit       | Mark | Name     |
|----------------|--------|--------|-------|------------|------|----------|
| 1              | 32.951 | 1542   | 114   | 0.365 mg/L |      | Vanillic |
| 2              | 32.713 | 25290  | 1627  | 0.091 mg/L |      | Coumaric |
| 3              | 32.616 | 6418   | 385   | 0.000 mg/L | V    |          |
| Total          |        | 31255  | 2246  |            |      |          |

| Peak Ret. Time | Area   | Height | Conc. | Unit       | Mark | Name    |
|----------------|--------|--------|-------|------------|------|---------|
| 1              | 36.504 | 45327  | 2642  | 0.351 mg/L |      | Ferulic |
| Total          |        | 45327  | 2642  |            |      |         |

LPE  
LabSolutions Analysis Report

<Sample Information>  
Sample Name : LPE  
Sample ID :  
Data Filename : LPE.kd  
Method Filename : 08010M.km  
Batch Filename : 08010M.kd  
Vial # : 1-21  
Injection Volume : 10 µL  
Date Acquired : 2020-10-27 6:18:53  
Date Processed : 2020-10-27 9:59:51  
Sample Type : Unknown  
Acquired by : System Administrator  
Processed by : System Administrator

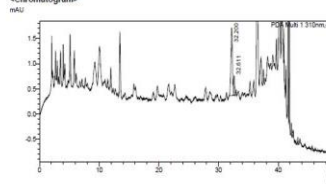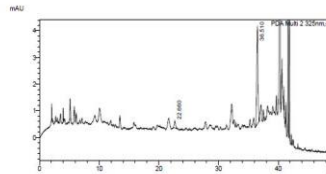

<Peak Table>  
PDA Ch1 310nm

| Peak Ret. Time | Area   | Height | Conc. | Unit       | Mark | Name     |
|----------------|--------|--------|-------|------------|------|----------|
| 1              | 32.903 | 23953  | 1338  | 0.127 mg/L |      | Coumaric |
| 2              | 32.611 | 4826   | 397   | 0.000 mg/L | V    |          |
| Total          |        | 28779  | 1735  |            |      |          |

| Peak Ret. Time | Area   | Height | Conc. | Unit       | Mark | Name    |
|----------------|--------|--------|-------|------------|------|---------|
| 1              | 36.463 | 4140   | 553   | 0.171 mg/L |      | Caffeic |
| 2              | 36.510 | 55760  | 3644  | 0.530 mg/L |      | Ferulic |
| Total          |        | 59900  | 3897  |            |      |         |
